# Supplementary material
Source: publisher figshare collection journal article supplement (https://acs.figshare.com/ndownloader/files/5731746)
Supplement: Supplementary file 1 [file 5731746]

**Supporting Info:**

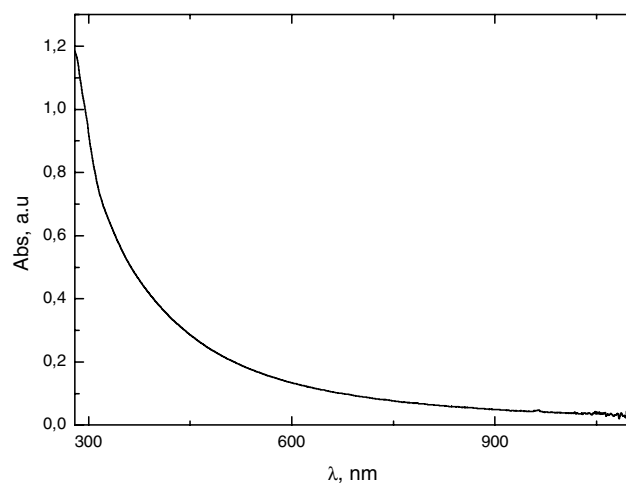

**Figure S1.** Absorption spectrum of 4.8 nm CoPt<sub>3</sub> nanocrystals dissolved in hexane

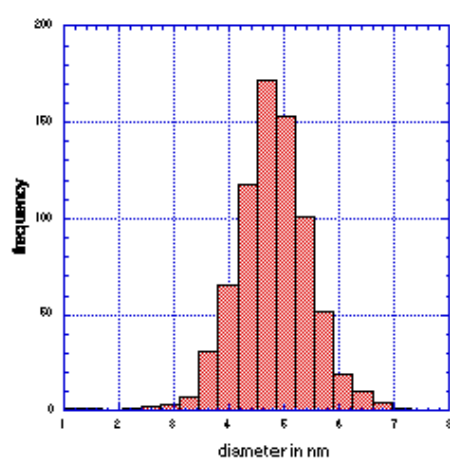

|               |             |
|---------------|-------------|
| Minimum       | 1.2766153   |
| Maximum       | 7.1729779   |
| Sum           | 3551.0194   |
| Points        | 741         |
| Mean          | 4.792199    |
| Median        | 4.7886372   |
| RMS           | 4.8404683   |
| Std Deviation | 0.68234227  |
| Variance      | 0.46559097  |
| Std Error     | 0.02506647  |
| Skewness      | -0.25412548 |
| Kurtosis      | 1.831369    |

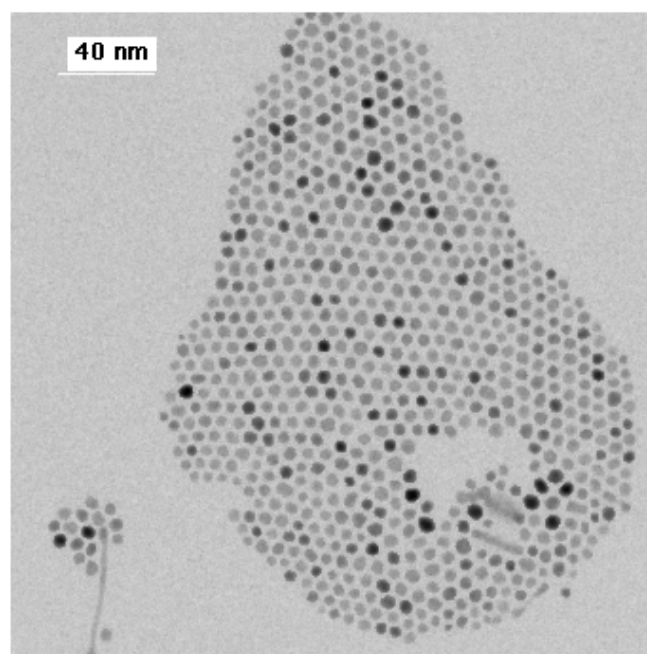

**Figure S2a.** Size histogram of CoPt<sub>3</sub> nanocrystals by injection of cobalt stock solution at 100°C into HDA-diphenyl ether coordinating mixture.

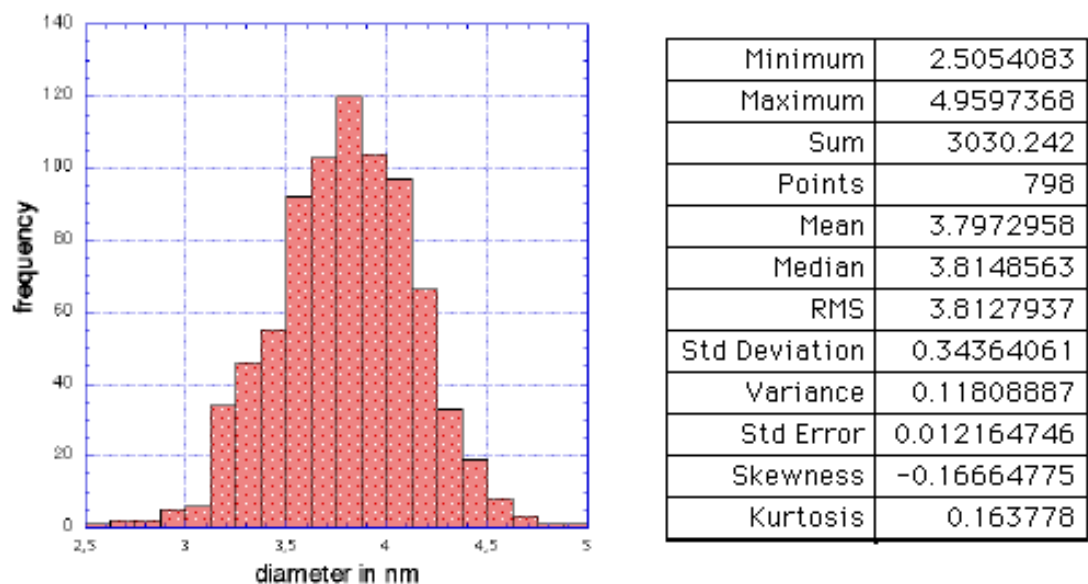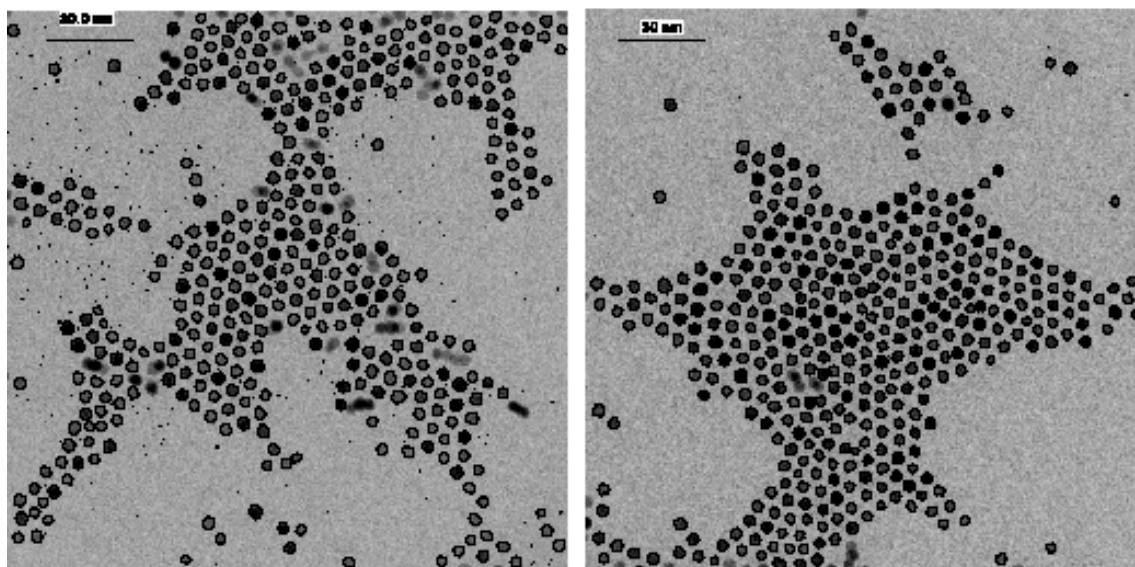

**Figure S2b.** Size histogram of as-prepared  $\text{CoPt}_3$  nanocrystals by injection of cobalt stock solution at  $170^\circ\text{C}$  into HDA-diphenyl ether coordinating mixture.

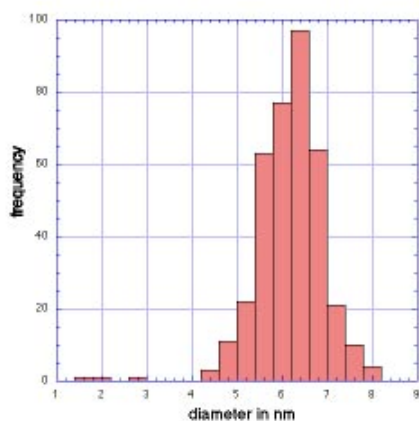

|               |             |
|---------------|-------------|
| Minimum       | 1.6273715   |
| Maximum       | 8.066925    |
| Sum           | 2316.8908   |
| Points        | 375         |
| Mean          | 6.1783754   |
| Median        | 6.2551298   |
| RMS           | 6.2226866   |
| Std Deviation | 0.74227695  |
| Variance      | 0.55097507  |
| Std Error     | 0.038331017 |
| Skewness      | -1.288306   |
| Kurtosis      | 6.6744184   |

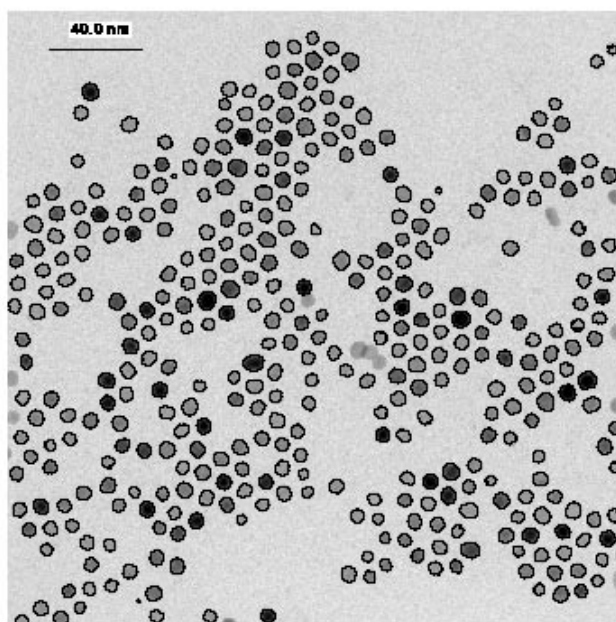

**Figure S2c.** Size histogram of as-prepared  $\text{CoPt}_3$  nanocrystals obtained by additional injection of platinum and cobalt precursors from 4.0 nm  $\text{CoPt}_3$  nanocrystals.

**CoPt<sub>3</sub> nanowires.** Injection of cobalt stock solution into HDA - diphenyl ether coordinating mixture at 100°C (refluxing for less than 40 min) yielded CoPt<sub>3</sub> nanowires as side-product of the spherical ~ 4.8 nm CoPt<sub>3</sub> nanocrystals (Figure S3a). The time of refluxing influence on the amount of nanowires (Figure S3b). The length of the wires varied from 6 nm up to 150-200 nm. The wires were not uniform in length, but typically comprised two ‘heads’ at the ends which were of approximately the same size as the spherical particles in the same sample, and a ‘body’ with some bulges (Figure S3a, *inset*, S3c). The mechanism of formation and decomposition of nanowires requires further careful investigations.

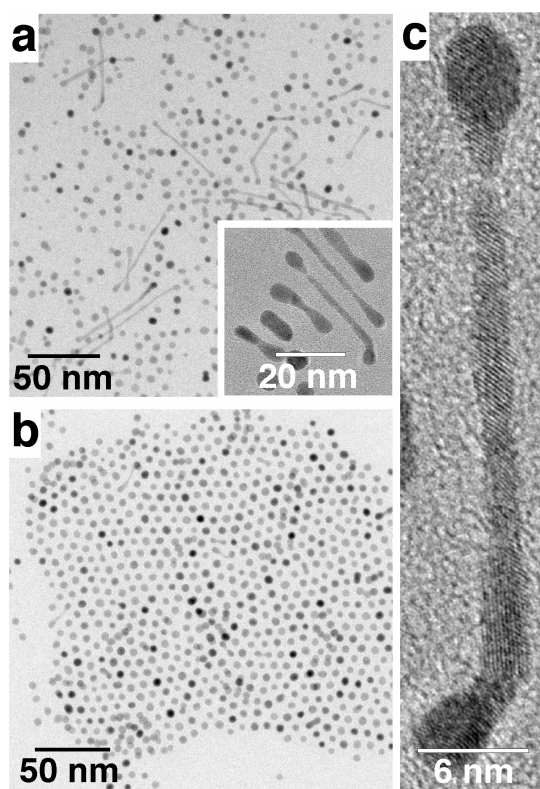

**Figure S3.** TEM images of as-prepared CoPt<sub>3</sub> nanocrystals grown in the HDA – diphenyl ether mixture: (a) 40 min refluxing, inset shows an enlarged view of non-uniformly shaped nanowires; (b) refluxing for 3 h, almost no nanowires are seen. (c) HRTEM image of a CoPt<sub>3</sub> nanowire illustrating differently oriented crystalline domains.

CoPt<sub>3</sub> nanowire-rich fractions can be isolated by high-speed centrifugation of colloidal solution(see Supporting Info).

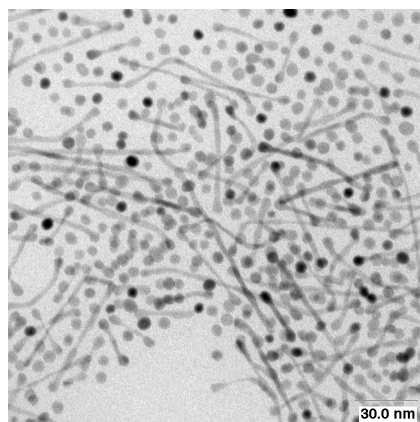

**Figure S4.** A typical TEM image of nanowires-rich CoPt<sub>3</sub> fraction.

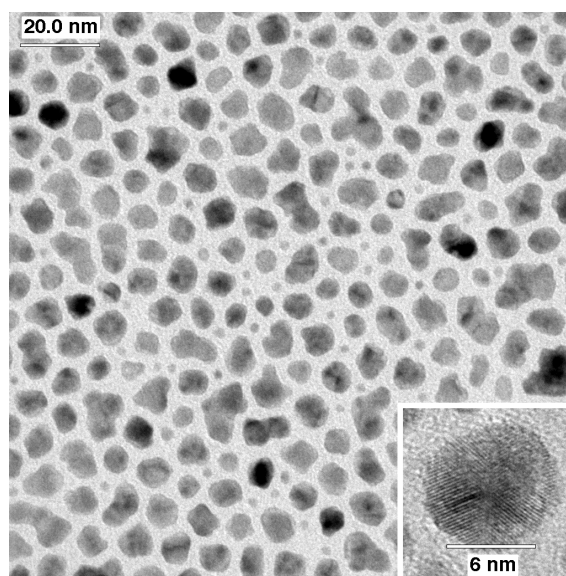

**Figure S5.** TEM image of as-prepared CoPt<sub>3</sub> nanocrystal obtained by three addition of precursors solution into reaction flask HRTEM image (inset) indicates polycrystalline structure

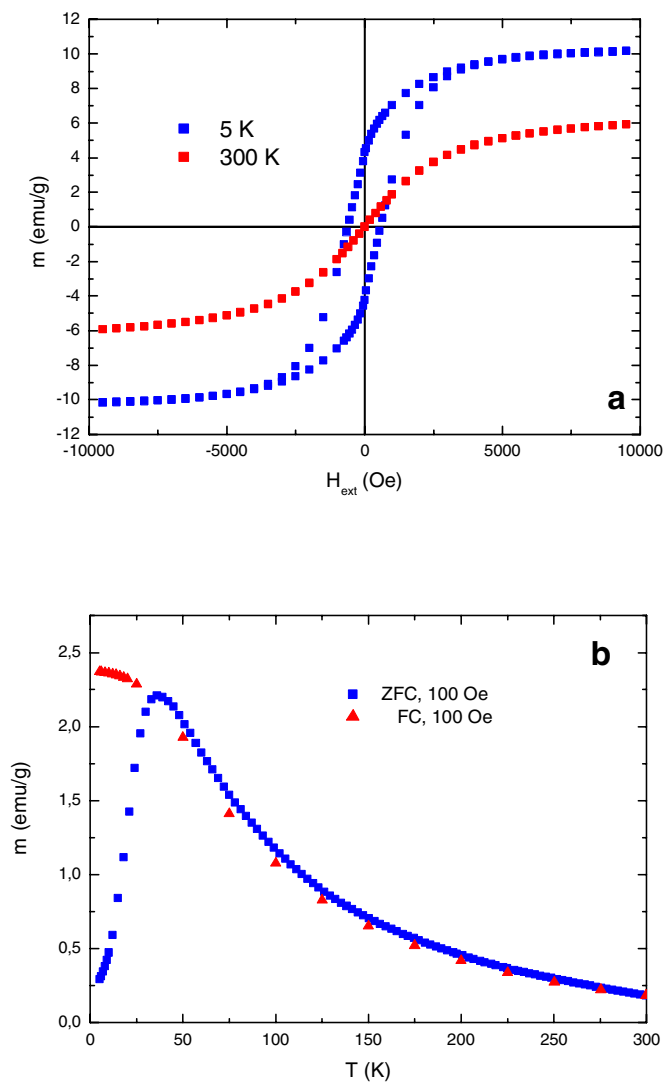

**Figure S6.** Magnetization vs. field measurements (a) and ZFC/ZF temperature dependencies (b) of the magnetization in a field of 100 Oe measured on ~6.2 nm CoPt<sub>3</sub> nanocrystals
